# Supplementary material
Source: PubMed Central journal article supplement (PMC2671375)
Supplement: supp_174_4_1443__2.pdf [file supp_174_4_1443__2.pdf]

**Supplemental Table 1. Cytokine and chemokines comparison between KC-Tie2 and KC-EC-Tie2 mouse models compared with littermate controls.**

| Characteristic              | KC-Tie2 mouse                     | KC-EC-Tie2 mouse                                                                 |
|-----------------------------|-----------------------------------|----------------------------------------------------------------------------------|
| <b>General inflammatory</b> |                                   |                                                                                  |
| TNF $\alpha$                | Yes (Taqman qRT-PCR)              | Not reported                                                                     |
| IL1                         | Increased (microarray)            | Not reported                                                                     |
| IL6                         | Increased (Taqman qRT-PCR)        | Increased in skin (semi-quantitative RT-PCR), no change in blood (protein array) |
| <b>Th1</b>                  |                                   |                                                                                  |
| IFN $\gamma$                | Increased (ELISA)                 | Increased in skin (semi-quantitative RT-PCR), no change in blood (protein array) |
| <b>Th17</b>                 |                                   |                                                                                  |
| IL17                        | Increased (ELISA)                 | No change (protein array)                                                        |
| IL22                        | Increased (ELISA)                 | Not reported                                                                     |
| <b>Th2</b>                  |                                   |                                                                                  |
| IL2                         | No difference (microarray)        | Increased in skin (semi-quantitative RT-PCR), no change in blood (protein array) |
| IL9                         | No difference (microarray)        | Increased in blood (protein array)                                               |
| IL4                         | No difference (ELISA, microarray) | Increased in blood (protein array)                                               |
| IL-5                        | No difference (microarray)        | Increased in skin (semi-quantitative RT-PCR), no change in blood (protein array) |
| TARC                        | No difference (microarray)        | Increased in skin (semi-quantitative RT-PCR) and in blood (protein array)        |
| Eotaxin                     | No difference (microarray)        | Increased in skin (semi-quantitative RT-PCR) and in blood (protein array)        |
| RANTES                      | No difference (microarray)        | Increased in skin (semi-quantitative RT-PCR) and in blood (protein array)        |
| <b>Macrophage</b>           |                                   |                                                                                  |
| IL12p70                     | Increased (ELISA)                 | Increased in blood (protein array)                                               |
| IL12p40                     | Increased (ELISA)                 | Increased in skin (semi-quantitative RT-PCR) and in blood (protein array)        |
| IL23                        | Increased (ELISA)                 | Not reported                                                                     |
